# Supplementary material for: Analysis of Adaptive Progressive Type-II Hybrid Censored Dagum Data with Applications
Source: MDPI journal article supplement (doi:10.3390/sym14102146), 2022-10-14
Supplement: s1 [file s1]

## Supplementary Materials

# Analysis of Adaptive Progressive Type-II Hybrid Censored Dagum Data With Applications

Heba S. Mohammed<sup>1</sup>, Mazen Nassar <sup>2,3\*</sup>, Refah Alotaibi<sup>1</sup> and Ahmed Elshahhat<sup>4</sup>

<sup>1</sup>Department of Mathematical Sciences, College of Science, Princess Nourah bint Abdulrahman University,  
P.O. Box 84428, Riyadh 11671, Saudi Arabia

<sup>2</sup>Department of Statistics, Faculty of Science, King Abdulaziz University, Jeddah 21589, Kingdom of Saudi Arabia

<sup>3</sup>Department of Statistics, Faculty of Commerce, Zagazig University, Egypt

<sup>4</sup>Faculty of Technology and Development, Zagazig University, Zagazig 44519, Egypt

---

\*Email: mmohamad3@kau.edu.sa and mezo10011@gmail.com

Table S1: The APE (1st column), RMSEs (2nd column) and MRABs (3rd column) of  $\alpha$ .

| $T$                  | $(n, m)$ | Scheme | MLE   |       |       | SE           |       |       |       |       | GE           |       |       |       |
|----------------------|----------|--------|-------|-------|-------|--------------|-------|-------|-------|-------|--------------|-------|-------|-------|
|                      |          |        |       |       |       | Pr.1<br>Pr.2 |       |       |       |       | Pr.1<br>Pr.2 |       |       |       |
|                      |          |        |       |       |       |              |       |       |       |       |              |       |       |       |
| $\kappa \rightarrow$ |          |        |       |       |       |              |       |       |       |       |              |       |       |       |
|                      |          |        |       |       |       |              |       |       |       | -2    |              |       | +2    |       |
| 0.1                  | (50,25)  | 1      | 0.770 | 0.608 | 0.515 | 0.519        | 0.164 | 0.329 | 0.530 | 0.134 | 0.326        | 0.427 | 0.126 | 0.307 |
|                      |          |        |       |       |       | 0.474        | 0.102 | 0.212 | 0.406 | 0.091 | 0.198        | 0.421 | 0.093 | 0.216 |
|                      |          | 2      | 0.768 | 0.650 | 0.528 | 0.502        | 0.135 | 0.301 | 0.510 | 0.112 | 0.274        | 0.298 | 0.166 | 0.254 |
|                      |          |        |       |       |       | 0.454        | 0.066 | 0.152 | 0.455 | 0.096 | 0.138        | 0.338 | 0.069 | 0.156 |
|                      |          | 3      | 1.072 | 0.684 | 0.625 | 0.285        | 0.133 | 0.289 | 0.293 | 0.107 | 0.268        | 0.327 | 0.180 | 0.355 |
|                      |          |        |       |       |       | 0.322        | 0.086 | 0.194 | 0.324 | 0.076 | 0.189        | 0.307 | 0.096 | 0.232 |
|                      | (50,40)  | 1      | 0.503 | 0.488 | 0.484 | 0.500        | 0.134 | 0.298 | 0.507 | 0.110 | 0.269        | 0.467 | 0.082 | 0.189 |
|                      |          |        |       |       |       | 0.456        | 0.072 | 0.161 | 0.479 | 0.080 | 0.146        | 0.437 | 0.055 | 0.131 |
|                      |          | 2      | 0.498 | 0.532 | 0.489 | 0.484        | 0.133 | 0.268 | 0.494 | 0.096 | 0.235        | 0.324 | 0.087 | 0.190 |
|                      |          |        |       |       |       | 0.358        | 0.065 | 0.112 | 0.362 | 0.039 | 0.096        | 0.442 | 0.049 | 0.113 |
|                      |          | 3      | 0.638 | 0.592 | 0.518 | 0.464        | 0.119 | 0.258 | 0.474 | 0.077 | 0.185        | 0.357 | 0.149 | 0.314 |
|                      |          |        |       |       |       | 0.456        | 0.080 | 0.164 | 0.459 | 0.061 | 0.148        | 0.425 | 0.063 | 0.150 |
|                      | (100,50) | 1      | 0.454 | 0.203 | 0.337 | 0.496        | 0.128 | 0.278 | 0.503 | 0.103 | 0.257        | 0.438 | 0.079 | 0.180 |
|                      |          |        |       |       |       | 0.368        | 0.043 | 0.080 | 0.458 | 0.059 | 0.125        | 0.362 | 0.040 | 0.094 |
|                      |          | 2      | 0.468 | 0.232 | 0.400 | 0.394        | 0.078 | 0.145 | 0.401 | 0.088 | 0.217        | 0.471 | 0.084 | 0.184 |
|                      |          |        |       |       |       | 0.367        | 0.042 | 0.082 | 0.368 | 0.032 | 0.079        | 0.362 | 0.039 | 0.094 |
|                      |          | 3      | 0.687 | 0.463 | 0.471 | 0.439        | 0.079 | 0.144 | 0.449 | 0.050 | 0.123        | 0.258 | 0.143 | 0.285 |
|                      |          |        |       |       |       | 0.446        | 0.069 | 0.138 | 0.444 | 0.045 | 0.111        | 0.432 | 0.043 | 0.100 |
|                      | (100,80) | 1      | 0.440 | 0.141 | 0.247 | 0.397        | 0.054 | 0.115 | 0.401 | 0.094 | 0.128        | 0.391 | 0.028 | 0.047 |
|                      |          |        |       |       |       | 0.404        | 0.043 | 0.068 | 0.369 | 0.031 | 0.077        | 0.386 | 0.016 | 0.036 |
|                      |          | 2      | 0.433 | 0.166 | 0.253 | 0.350        | 0.070 | 0.134 | 0.353 | 0.047 | 0.118        | 0.437 | 0.064 | 0.153 |
|                      |          |        |       |       |       | 0.414        | 0.041 | 0.062 | 0.416 | 0.018 | 0.040        | 0.400 | 0.031 | 0.066 |
|                      |          | 3      | 0.427 | 0.279 | 0.393 | 0.413        | 0.060 | 0.109 | 0.433 | 0.035 | 0.083        | 0.417 | 0.037 | 0.087 |
|                      |          |        |       |       |       | 0.431        | 0.052 | 0.099 | 0.417 | 0.023 | 0.048        | 0.399 | 0.020 | 0.040 |
| 0.5                  | (50,25)  | 1      | 0.764 | 0.284 | 0.478 | 0.222        | 0.188 | 0.444 | 0.231 | 0.169 | 0.422        | 0.171 | 0.236 | 0.442 |
|                      |          |        |       |       |       | 0.474        | 0.103 | 0.212 | 0.479 | 0.081 | 0.198        | 0.294 | 0.184 | 0.267 |
|                      |          | 2      | 0.783 | 0.381 | 0.509 | 0.229        | 0.182 | 0.427 | 0.238 | 0.162 | 0.406        | 0.176 | 0.232 | 0.459 |
|                      |          |        |       |       |       | 0.352        | 0.072 | 0.133 | 0.363 | 0.089 | 0.193        | 0.291 | 0.187 | 0.273 |
|                      |          | 3      | 1.024 | 0.418 | 0.597 | 0.528        | 0.176 | 0.347 | 0.541 | 0.144 | 0.353        | 0.447 | 0.101 | 0.241 |
|                      |          |        |       |       |       | 0.481        | 0.097 | 0.223 | 0.484 | 0.084 | 0.209        | 0.455 | 0.075 | 0.174 |
|                      | (50,40)  | 1      | 0.513 | 0.250 | 0.428 | 0.530        | 0.161 | 0.355 | 0.538 | 0.138 | 0.346        | 0.410 | 0.157 | 0.368 |
|                      |          |        |       |       |       | 0.460        | 0.095 | 0.170 | 0.465 | 0.068 | 0.163        | 0.420 | 0.094 | 0.218 |
|                      |          | 2      | 0.510 | 0.361 | 0.462 | 0.513        | 0.149 | 0.301 | 0.522 | 0.124 | 0.304        | 0.288 | 0.132 | 0.281 |
|                      |          |        |       |       |       | 0.360        | 0.060 | 0.106 | 0.401 | 0.074 | 0.118        | 0.325 | 0.083 | 0.188 |
|                      |          | 3      | 0.556 | 0.386 | 0.507 | 0.518        | 0.161 | 0.356 | 0.529 | 0.131 | 0.322        | 0.485 | 0.096 | 0.218 |
|                      |          |        |       |       |       | 0.433        | 0.057 | 0.109 | 0.436 | 0.037 | 0.089        | 0.353 | 0.067 | 0.140 |
|                      | (100,50) | 1      | 0.449 | 0.198 | 0.332 | 0.510        | 0.156 | 0.208 | 0.521 | 0.124 | 0.302        | 0.421 | 0.122 | 0.295 |
|                      |          |        |       |       |       | 0.340        | 0.069 | 0.150 | 0.342 | 0.058 | 0.145        | 0.331 | 0.072 | 0.174 |
|                      |          | 2      | 0.453 | 0.222 | 0.402 | 0.326        | 0.086 | 0.185 | 0.329 | 0.071 | 0.177        | 0.486 | 0.089 | 0.215 |
|                      |          |        |       |       |       | 0.397        | 0.058 | 0.077 | 0.356 | 0.044 | 0.109        | 0.332 | 0.081 | 0.170 |
|                      |          | 3      | 0.714 | 0.311 | 0.419 | 0.497        | 0.116 | 0.265 | 0.501 | 0.102 | 0.252        | 0.474 | 0.085 | 0.195 |
|                      |          |        |       |       |       | 0.382        | 0.050 | 0.078 | 0.385 | 0.016 | 0.039        | 0.398 | 0.065 | 0.117 |
|                      | (100,80) | 1      | 0.436 | 0.151 | 0.217 | 0.503        | 0.118 | 0.174 | 0.506 | 0.107 | 0.206        | 0.488 | 0.093 | 0.209 |
|                      |          |        |       |       |       | 0.398        | 0.057 | 0.077 | 0.402 | 0.046 | 0.110        | 0.438 | 0.050 | 0.115 |
|                      |          | 2      | 0.439 | 0.157 | 0.237 | 0.353        | 0.085 | 0.141 | 0.360 | 0.042 | 0.100        | 0.332 | 0.070 | 0.171 |
|                      |          |        |       |       |       | 0.393        | 0.045 | 0.054 | 0.396 | 0.029 | 0.095        | 0.364 | 0.065 | 0.092 |
|                      |          | 3      | 0.423 | 0.247 | 0.263 | 0.383        | 0.065 | 0.118 | 0.414 | 0.015 | 0.035        | 0.350 | 0.068 | 0.125 |
|                      |          |        |       |       |       | 0.411        | 0.051 | 0.074 | 0.388 | 0.013 | 0.031        | 0.381 | 0.054 | 0.092 |

Table S2: The APE (1st column), RMSEs (2nd column) and MRABs (3rd column) of  $\beta$ .

| $T$                  | $(n, m)$ | Scheme | MLE   |       |       | SE           |       |       |              |       | GE    |       |       |       |
|----------------------|----------|--------|-------|-------|-------|--------------|-------|-------|--------------|-------|-------|-------|-------|-------|
|                      |          |        |       |       |       | Pr.1<br>Pr.2 |       |       | Pr.1<br>Pr.2 |       |       |       |       |       |
|                      |          |        |       |       |       |              |       |       |              |       |       |       |       |       |
| $\kappa \rightarrow$ |          |        |       |       |       |              |       |       |              | -2    |       |       | +2    |       |
| 0.1                  | (50,25)  | 1      | 0.354 | 0.628 | 0.515 | 0.156        | 0.080 | 0.295 | 0.157        | 0.048 | 0.220 | 0.143 | 0.057 | 0.283 |
|                      |          |        |       |       |       | 0.151        | 0.070 | 0.248 | 0.166        | 0.047 | 0.218 | 0.144 | 0.056 | 0.282 |
|                      |          | 2      | 0.439 | 0.775 | 0.744 | 0.157        | 0.079 | 0.291 | 0.167        | 0.046 | 0.214 | 0.141 | 0.059 | 0.295 |
|                      |          |        |       |       |       | 0.165        | 0.050 | 0.213 | 0.220        | 0.021 | 0.101 | 0.161 | 0.040 | 0.197 |
|                      |          | 3      | 0.419 | 0.472 | 0.726 | 0.275        | 0.092 | 0.382 | 0.280        | 0.080 | 0.401 | 0.260 | 0.061 | 0.302 |
|                      |          |        |       |       |       | 0.266        | 0.072 | 0.330 | 0.267        | 0.068 | 0.337 | 0.259 | 0.059 | 0.296 |
|                      | (50,40)  | 1      | 0.240 | 0.294 | 0.206 | 0.179        | 0.067 | 0.252 | 0.159        | 0.042 | 0.205 | 0.149 | 0.051 | 0.254 |
|                      |          |        |       |       |       | 0.182        | 0.052 | 0.152 | 0.188        | 0.021 | 0.100 | 0.174 | 0.026 | 0.129 |
|                      |          | 2      | 0.257 | 0.364 | 0.254 | 0.154        | 0.072 | 0.287 | 0.162        | 0.044 | 0.204 | 0.144 | 0.056 | 0.280 |
|                      |          |        |       |       |       | 0.193        | 0.043 | 0.135 | 0.188        | 0.017 | 0.080 | 0.179 | 0.022 | 0.105 |
|                      |          | 3      | 0.407 | 0.365 | 0.634 | 0.255        | 0.077 | 0.277 | 0.260        | 0.063 | 0.299 | 0.245 | 0.046 | 0.226 |
|                      |          |        |       |       |       | 0.213        | 0.050 | 0.125 | 0.218        | 0.025 | 0.090 | 0.181 | 0.019 | 0.093 |
|                      | (100,50) | 1      | 0.213 | 0.118 | 0.129 | 0.156        | 0.056 | 0.194 | 0.188        | 0.030 | 0.139 | 0.167 | 0.034 | 0.165 |
|                      |          |        |       |       |       | 0.184        | 0.039 | 0.130 | 0.188        | 0.018 | 0.084 | 0.178 | 0.024 | 0.112 |
|                      |          | 2      | 0.251 | 0.346 | 0.243 | 0.218        | 0.034 | 0.116 | 0.168        | 0.035 | 0.161 | 0.185 | 0.016 | 0.073 |
|                      |          |        |       |       |       | 0.185        | 0.038 | 0.124 | 0.197        | 0.016 | 0.071 | 0.214 | 0.014 | 0.069 |
|                      |          | 3      | 0.379 | 0.314 | 0.602 | 0.173        | 0.056 | 0.200 | 0.234        | 0.035 | 0.171 | 0.163 | 0.037 | 0.183 |
|                      |          |        |       |       |       | 0.188        | 0.042 | 0.134 | 0.192        | 0.016 | 0.076 | 0.206 | 0.018 | 0.032 |
|                      | (100,80) | 1      | 0.204 | 0.047 | 0.081 | 0.197        | 0.028 | 0.107 | 0.214        | 0.018 | 0.069 | 0.192 | 0.019 | 0.038 |
|                      |          |        |       |       |       | 0.211        | 0.036 | 0.079 | 0.199        | 0.014 | 0.014 | 0.208 | 0.018 | 0.038 |
|                      |          | 2      | 0.208 | 0.076 | 0.097 | 0.190        | 0.034 | 0.104 | 0.193        | 0.011 | 0.052 | 0.186 | 0.014 | 0.070 |
|                      |          |        |       |       |       | 0.202        | 0.025 | 0.083 | 0.204        | 0.007 | 0.021 | 0.199 | 0.013 | 0.015 |
|                      |          | 3      | 0.302 | 0.298 | 0.344 | 0.232        | 0.047 | 0.167 | 0.179        | 0.028 | 0.131 | 0.226 | 0.026 | 0.130 |
|                      |          |        |       |       |       | 0.199        | 0.041 | 0.100 | 0.203        | 0.016 | 0.057 | 0.193 | 0.017 | 0.040 |
| 0.5                  | (50,25)  | 1      | 0.403 | 0.819 | 0.634 | 0.324        | 0.134 | 0.418 | 0.328        | 0.128 | 0.439 | 0.310 | 0.110 | 0.450 |
|                      |          |        |       |       |       | 0.183        | 0.054 | 0.160 | 0.233        | 0.033 | 0.165 | 0.227 | 0.027 | 0.133 |
|                      |          | 2      | 0.503 | 0.959 | 0.905 | 0.317        | 0.127 | 0.585 | 0.321        | 0.121 | 0.405 | 0.304 | 0.104 | 0.420 |
|                      |          |        |       |       |       | 0.229        | 0.042 | 0.153 | 0.232        | 0.033 | 0.161 | 0.228 | 0.028 | 0.138 |
|                      |          | 3      | 0.418 | 0.497 | 0.733 | 0.155        | 0.089 | 0.311 | 0.169        | 0.049 | 0.234 | 0.141 | 0.059 | 0.294 |
|                      |          |        |       |       |       | 0.176        | 0.040 | 0.154 | 0.179        | 0.023 | 0.108 | 0.172 | 0.028 | 0.140 |
|                      | (50,40)  | 1      | 0.265 | 0.385 | 0.266 | 0.182        | 0.065 | 0.191 | 0.184        | 0.031 | 0.146 | 0.167 | 0.034 | 0.166 |
|                      |          |        |       |       |       | 0.231        | 0.052 | 0.151 | 0.222        | 0.023 | 0.109 | 0.175 | 0.025 | 0.127 |
|                      |          | 2      | 0.283 | 0.465 | 0.319 | 0.144        | 0.086 | 0.348 | 0.271        | 0.071 | 0.354 | 0.129 | 0.072 | 0.356 |
|                      |          |        |       |       |       | 0.231        | 0.041 | 0.153 | 0.232        | 0.033 | 0.162 | 0.227 | 0.027 | 0.135 |
|                      |          | 3      | 0.424 | 0.371 | 0.670 | 0.180        | 0.070 | 0.195 | 0.190        | 0.033 | 0.152 | 0.167 | 0.033 | 0.163 |
|                      |          |        |       |       |       | 0.186        | 0.047 | 0.132 | 0.190        | 0.020 | 0.095 | 0.180 | 0.021 | 0.102 |
|                      | (100,50) | 1      | 0.225 | 0.230 | 0.155 | 0.176        | 0.064 | 0.184 | 0.191        | 0.028 | 0.128 | 0.170 | 0.031 | 0.150 |
|                      |          |        |       |       |       | 0.201        | 0.043 | 0.119 | 0.188        | 0.023 | 0.098 | 0.217 | 0.019 | 0.083 |
|                      |          | 2      | 0.269 | 0.366 | 0.284 | 0.269        | 0.075 | 0.347 | 0.154        | 0.055 | 0.252 | 0.265 | 0.065 | 0.325 |
|                      |          |        |       |       |       | 0.231        | 0.040 | 0.158 | 0.231        | 0.031 | 0.156 | 0.225 | 0.025 | 0.123 |
|                      |          | 3      | 0.365 | 0.308 | 0.581 | 0.174        | 0.051 | 0.181 | 0.178        | 0.028 | 0.131 | 0.170 | 0.031 | 0.152 |
|                      |          |        |       |       |       | 0.198        | 0.038 | 0.091 | 0.190        | 0.013 | 0.062 | 0.185 | 0.015 | 0.073 |
|                      | (100,80) | 1      | 0.207 | 0.093 | 0.091 | 0.220        | 0.034 | 0.116 | 0.207        | 0.021 | 0.078 | 0.193 | 0.017 | 0.042 |
|                      |          |        |       |       |       | 0.210        | 0.033 | 0.104 | 0.212        | 0.014 | 0.060 | 0.204 | 0.015 | 0.021 |
|                      |          | 2      | 0.208 | 0.072 | 0.104 | 0.219        | 0.035 | 0.144 | 0.221        | 0.021 | 0.104 | 0.205 | 0.016 | 0.063 |
|                      |          |        |       |       |       | 0.209        | 0.024 | 0.095 | 0.210        | 0.010 | 0.049 | 0.213 | 0.013 | 0.026 |
|                      |          | 3      | 0.286 | 0.263 | 0.302 | 0.213        | 0.033 | 0.118 | 0.215        | 0.016 | 0.077 | 0.208 | 0.018 | 0.040 |
|                      |          |        |       |       |       | 0.188        | 0.030 | 0.074 | 0.201        | 0.013 | 0.049 | 0.194 | 0.016 | 0.030 |

Table S3: The APE (1st column), RMSEs (2nd column) and MRABs (3rd column) of  $\theta$ .

| $T$                  | $(n, m)$ | Scheme | MLE   |       |       | SE           |       |       |       |       | GE           |       |       |       |
|----------------------|----------|--------|-------|-------|-------|--------------|-------|-------|-------|-------|--------------|-------|-------|-------|
|                      |          |        |       |       |       | Pr.1<br>Pr.2 |       |       |       |       | Pr.1<br>Pr.2 |       |       |       |
|                      |          |        |       |       |       |              |       |       |       |       |              |       |       |       |
| $\kappa \rightarrow$ |          |        |       |       |       |              |       |       |       | -2    |              |       | +2    |       |
| 0.1                  | (50,25)  | 1      | 0.100 | 0.094 | 0.664 | 0.302        | 0.085 | 0.519 | 0.113 | 0.066 | 0.435        | 0.077 | 0.086 | 0.436 |
|                      |          |        |       |       |       | 0.196        | 0.073 | 0.465 | 0.114 | 0.065 | 0.352        | 0.103 | 0.075 | 0.354 |
|                      |          | 2      | 0.099 | 0.118 | 0.782 | 0.269        | 0.109 | 0.592 | 0.283 | 0.102 | 0.525        | 0.216 | 0.097 | 0.593 |
|                      |          |        |       |       |       | 0.114        | 0.072 | 0.517 | 0.116 | 0.069 | 0.384        | 0.106 | 0.059 | 0.479 |
|                      |          | 3      | 0.049 | 0.087 | 0.785 | 0.264        | 0.083 | 0.661 | 0.052 | 0.070 | 0.497        | 0.028 | 0.072 | 0.619 |
|                      |          |        |       |       |       | 0.173        | 0.078 | 0.637 | 0.175 | 0.076 | 0.354        | 0.166 | 0.067 | 0.564 |
|                      | (50,40)  | 1      | 0.104 | 0.067 | 0.498 | 0.156        | 0.064 | 0.419 | 0.165 | 0.029 | 0.351        | 0.126 | 0.056 | 0.262 |
|                      |          |        |       |       |       | 0.163        | 0.060 | 0.339 | 0.165 | 0.021 | 0.133        | 0.155 | 0.028 | 0.255 |
|                      |          | 2      | 0.102 | 0.069 | 0.516 | 0.188        | 0.066 | 0.413 | 0.174 | 0.060 | 0.436        | 0.129 | 0.063 | 0.433 |
|                      |          |        |       |       |       | 0.166        | 0.040 | 0.371 | 0.168 | 0.031 | 0.301        | 0.158 | 0.018 | 0.168 |
|                      |          | 3      | 0.059 | 0.079 | 0.692 | 0.045        | 0.066 | 0.609 | 0.270 | 0.049 | 0.476        | 0.240 | 0.054 | 0.528 |
|                      |          |        |       |       |       | 0.080        | 0.048 | 0.419 | 0.084 | 0.031 | 0.305        | 0.074 | 0.053 | 0.400 |
|                      | (100,50) | 1      | 0.104 | 0.060 | 0.429 | 0.107        | 0.039 | 0.329 | 0.311 | 0.015 | 0.287        | 0.274 | 0.023 | 0.232 |
|                      |          |        |       |       |       | 0.126        | 0.036 | 0.310 | 0.200 | 0.013 | 0.109        | 0.185 | 0.019 | 0.098 |
|                      |          | 2      | 0.102 | 0.068 | 0.491 | 0.163        | 0.063 | 0.385 | 0.059 | 0.062 | 0.414        | 0.027 | 0.048 | 0.291 |
|                      |          |        |       |       |       | 0.127        | 0.028 | 0.314 | 0.130 | 0.017 | 0.196        | 0.117 | 0.017 | 0.065 |
|                      |          | 3      | 0.068 | 0.067 | 0.555 | 0.045        | 0.063 | 0.596 | 0.055 | 0.047 | 0.449        | 0.024 | 0.046 | 0.359 |
|                      |          |        |       |       |       | 0.063        | 0.034 | 0.257 | 0.070 | 0.019 | 0.177        | 0.047 | 0.026 | 0.257 |
|                      | (100,80) | 1      | 0.101 | 0.042 | 0.320 | 0.104        | 0.036 | 0.261 | 0.110 | 0.013 | 0.144        | 0.091 | 0.019 | 0.181 |
|                      |          |        |       |       |       | 0.113        | 0.025 | 0.194 | 0.129 | 0.010 | 0.100        | 0.118 | 0.011 | 0.089 |
|                      |          | 2      | 0.102 | 0.045 | 0.343 | 0.047        | 0.044 | 0.299 | 0.202 | 0.040 | 0.216        | 0.147 | 0.031 | 0.174 |
|                      |          |        |       |       |       | 0.108        | 0.021 | 0.143 | 0.110 | 0.010 | 0.165        | 0.103 | 0.015 | 0.035 |
|                      |          | 3      | 0.082 | 0.052 | 0.408 | 0.095        | 0.048 | 0.400 | 0.106 | 0.013 | 0.191        | 0.062 | 0.038 | 0.282 |
|                      |          |        |       |       |       | 0.110        | 0.028 | 0.225 | 0.113 | 0.011 | 0.127        | 0.101 | 0.013 | 0.125 |
| 0.5                  | (50,25)  | 1      | 0.102 | 0.141 | 0.716 | 0.103        | 0.084 | 0.560 | 0.110 | 0.082 | 0.473        | 0.073 | 0.075 | 0.451 |
|                      |          |        |       |       |       | 0.112        | 0.063 | 0.497 | 0.114 | 0.049 | 0.440        | 0.103 | 0.071 | 0.355 |
|                      |          | 2      | 0.110 | 0.219 | 0.929 | 0.381        | 0.192 | 0.614 | 0.389 | 0.189 | 0.598        | 0.338 | 0.144 | 0.479 |
|                      |          |        |       |       |       | 0.124        | 0.062 | 0.558 | 0.127 | 0.044 | 0.396        | 0.117 | 0.062 | 0.361 |
|                      |          | 3      | 0.050 | 0.087 | 0.785 | 0.088        | 0.068 | 0.537 | 0.095 | 0.060 | 0.582        | 0.067 | 0.042 | 0.355 |
|                      |          |        |       |       |       | 0.156        | 0.067 | 0.508 | 0.160 | 0.058 | 0.502        | 0.142 | 0.035 | 0.416 |
|                      | (50,40)  | 1      | 0.096 | 0.065 | 0.497 | 0.055        | 0.062 | 0.477 | 0.068 | 0.046 | 0.402        | 0.025 | 0.056 | 0.269 |
|                      |          |        |       |       |       | 0.050        | 0.060 | 0.453 | 0.060 | 0.044 | 0.329        | 0.034 | 0.027 | 0.318 |
|                      |          | 2      | 0.095 | 0.071 | 0.522 | 0.053        | 0.058 | 0.461 | 0.067 | 0.037 | 0.338        | 0.022 | 0.068 | 0.377 |
|                      |          |        |       |       |       | 0.051        | 0.036 | 0.283 | 0.060 | 0.028 | 0.271        | 0.034 | 0.049 | 0.218 |
|                      |          | 3      | 0.070 | 0.079 | 0.684 | 0.130        | 0.050 | 0.447 | 0.134 | 0.047 | 0.464        | 0.118 | 0.040 | 0.331 |
|                      |          |        |       |       |       | 0.085        | 0.046 | 0.360 | 0.088 | 0.034 | 0.339        | 0.073 | 0.033 | 0.394 |
|                      | (100,50) | 1      | 0.101 | 0.060 | 0.433 | 0.141        | 0.042 | 0.350 | 0.147 | 0.036 | 0.360        | 0.124 | 0.032 | 0.246 |
|                      |          |        |       |       |       | 0.135        | 0.039 | 0.320 | 0.136 | 0.012 | 0.143        | 0.132 | 0.025 | 0.142 |
|                      |          | 2      | 0.099 | 0.067 | 0.507 | 0.201        | 0.064 | 0.489 | 0.228 | 0.035 | 0.319        | 0.128 | 0.052 | 0.278 |
|                      |          |        |       |       |       | 0.106        | 0.033 | 0.268 | 0.110 | 0.018 | 0.099        | 0.100 | 0.022 | 0.167 |
|                      |          | 3      | 0.063 | 0.068 | 0.568 | 0.152        | 0.043 | 0.346 | 0.158 | 0.021 | 0.206        | 0.135 | 0.027 | 0.176 |
|                      |          |        |       |       |       | 0.145        | 0.030 | 0.234 | 0.146 | 0.016 | 0.117        | 0.139 | 0.018 | 0.273 |
|                      | (100,80) | 1      | 0.100 | 0.045 | 0.338 | 0.091        | 0.038 | 0.271 | 0.098 | 0.015 | 0.106        | 0.075 | 0.024 | 0.239 |
|                      |          |        |       |       |       | 0.180        | 0.025 | 0.195 | 0.181 | 0.010 | 0.100        | 0.174 | 0.011 | 0.101 |
|                      |          | 2      | 0.101 | 0.047 | 0.351 | 0.061        | 0.041 | 0.228 | 0.068 | 0.032 | 0.278        | 0.048 | 0.035 | 0.123 |
|                      |          |        |       |       |       | 0.091        | 0.029 | 0.171 | 0.096 | 0.013 | 0.074        | 0.078 | 0.017 | 0.108 |
|                      |          | 3      | 0.084 | 0.049 | 0.391 | 0.112        | 0.038 | 0.308 | 0.121 | 0.018 | 0.178        | 0.090 | 0.016 | 0.101 |
|                      |          |        |       |       |       | 0.091        | 0.023 | 0.177 | 0.093 | 0.012 | 0.079        | 0.084 | 0.010 | 0.158 |

Table S4: The APE (1st column), RMSEs (2nd column) and MRABs (3rd column) of  $R(t)$ .

| $T$                  | $(n, m)$ | Scheme | MLE   |       |       | SE           |       |       |       | GE           |       |       |       |       |
|----------------------|----------|--------|-------|-------|-------|--------------|-------|-------|-------|--------------|-------|-------|-------|-------|
|                      |          |        |       |       |       | Pr.1<br>Pr.2 |       |       |       | Pr.1<br>Pr.2 |       |       |       |       |
|                      |          |        |       |       |       |              |       |       |       |              |       |       |       |       |
| $\kappa \rightarrow$ |          |        |       |       |       |              |       |       |       | -2           |       | +2    |       |       |
| 0.1                  | (50,25)  | 1      | 0.049 | 0.135 | 0.663 | 0.056        | 0.074 | 0.584 | 0.060 | 0.071        | 0.575 | 0.041 | 0.054 | 0.447 |
|                      |          |        |       |       |       | 0.055        | 0.046 | 0.437 | 0.056 | 0.045        | 0.433 | 0.048 | 0.037 | 0.365 |
|                      |          | 2      | 0.052 | 0.146 | 0.862 | 0.119        | 0.088 | 0.613 | 0.127 | 0.084        | 0.676 | 0.086 | 0.045 | 0.510 |
|                      |          |        |       |       |       | 0.049        | 0.023 | 0.429 | 0.050 | 0.020        | 0.456 | 0.046 | 0.017 | 0.382 |
|                      |          | 3      | 0.055 | 0.177 | 0.910 | 0.022        | 0.063 | 0.537 | 0.024 | 0.061        | 0.682 | 0.015 | 0.050 | 0.650 |
|                      |          |        |       |       |       | 0.077        | 0.038 | 0.421 | 0.079 | 0.037        | 0.555 | 0.072 | 0.030 | 0.503 |
|                      | (50,40)  | 1      | 0.048 | 0.107 | 0.486 | 0.077        | 0.046 | 0.360 | 0.083 | 0.041        | 0.401 | 0.058 | 0.018 | 0.361 |
|                      |          |        |       |       |       | 0.060        | 0.020 | 0.337 | 0.061 | 0.019        | 0.315 | 0.058 | 0.018 | 0.253 |
|                      |          | 2      | 0.049 | 0.106 | 0.533 | 0.081        | 0.050 | 0.458 | 0.087 | 0.045        | 0.441 | 0.060 | 0.031 | 0.335 |
|                      |          |        |       |       |       | 0.061        | 0.021 | 0.359 | 0.062 | 0.018        | 0.392 | 0.059 | 0.012 | 0.269 |
|                      |          | 3      | 0.040 | 0.153 | 0.704 | 0.101        | 0.025 | 0.492 | 0.104 | 0.020        | 0.439 | 0.092 | 0.031 | 0.599 |
|                      |          |        |       |       |       | 0.028        | 0.018 | 0.378 | 0.029 | 0.018        | 0.324 | 0.027 | 0.019 | 0.440 |
|                      | (100,50) | 1      | 0.047 | 0.094 | 0.430 | 0.109        | 0.025 | 0.267 | 0.113 | 0.017        | 0.348 | 0.096 | 0.017 | 0.172 |
|                      |          |        |       |       |       | 0.086        | 0.017 | 0.198 | 0.087 | 0.013        | 0.256 | 0.079 | 0.015 | 0.107 |
|                      |          | 2      | 0.049 | 0.090 | 0.455 | 0.018        | 0.028 | 0.380 | 0.021 | 0.033        | 0.370 | 0.012 | 0.019 | 0.317 |
|                      |          |        |       |       |       | 0.058        | 0.020 | 0.289 | 0.059 | 0.017        | 0.246 | 0.054 | 0.010 | 0.177 |
|                      |          | 3      | 0.049 | 0.135 | 0.610 | 0.020        | 0.023 | 0.423 | 0.022 | 0.018        | 0.373 | 0.012 | 0.028 | 0.421 |
|                      |          |        |       |       |       | 0.031        | 0.015 | 0.333 | 0.034 | 0.014        | 0.212 | 0.024 | 0.015 | 0.360 |
|                      | (100,80) | 1      | 0.045 | 0.079 | 0.334 | 0.053        | 0.018 | 0.215 | 0.055 | 0.014        | 0.287 | 0.047 | 0.016 | 0.144 |
|                      |          |        |       |       |       | 0.053        | 0.015 | 0.130 | 0.054 | 0.012        | 0.203 | 0.050 | 0.013 | 0.104 |
|                      |          | 2      | 0.046 | 0.081 | 0.372 | 0.063        | 0.026 | 0.245 | 0.066 | 0.022        | 0.252 | 0.053 | 0.011 | 0.237 |
|                      |          |        |       |       |       | 0.040        | 0.016 | 0.197 | 0.041 | 0.012        | 0.182 | 0.039 | 0.009 | 0.098 |
|                      |          | 3      | 0.040 | 0.127 | 0.532 | 0.030        | 0.021 | 0.386 | 0.035 | 0.014        | 0.187 | 0.018 | 0.025 | 0.380 |
|                      |          |        |       |       |       | 0.050        | 0.014 | 0.254 | 0.051 | 0.011        | 0.126 | 0.046 | 0.014 | 0.278 |
| 0.5                  | (50,25)  | 1      | 0.047 | 0.131 | 0.684 | 0.053        | 0.043 | 0.588 | 0.057 | 0.042        | 0.554 | 0.038 | 0.036 | 0.543 |
|                      |          |        |       |       |       | 0.055        | 0.037 | 0.520 | 0.056 | 0.033        | 0.476 | 0.048 | 0.028 | 0.447 |
|                      |          | 2      | 0.049 | 0.142 | 0.840 | 0.164        | 0.129 | 0.460 | 0.169 | 0.127        | 0.607 | 0.141 | 0.101 | 0.581 |
|                      |          |        |       |       |       | 0.047        | 0.051 | 0.419 | 0.048 | 0.020        | 0.472 | 0.043 | 0.028 | 0.359 |
|                      |          | 3      | 0.057 | 0.172 | 0.705 | 0.036        | 0.036 | 0.645 | 0.039 | 0.034        | 0.677 | 0.027 | 0.025 | 0.590 |
|                      |          |        |       |       |       | 0.064        | 0.031 | 0.545 | 0.066 | 0.029        | 0.542 | 0.057 | 0.022 | 0.555 |
|                      | (50,40)  | 1      | 0.045 | 0.096 | 0.511 | 0.014        | 0.030 | 0.478 | 0.017 | 0.026        | 0.404 | 0.006 | 0.035 | 0.470 |
|                      |          |        |       |       |       | 0.021        | 0.024 | 0.337 | 0.022 | 0.020        | 0.314 | 0.015 | 0.020 | 0.140 |
|                      |          | 2      | 0.046 | 0.093 | 0.567 | 0.014        | 0.032 | 0.381 | 0.017 | 0.027        | 0.482 | 0.006 | 0.037 | 0.448 |
|                      |          |        |       |       |       | 0.021        | 0.024 | 0.232 | 0.022 | 0.015        | 0.128 | 0.015 | 0.018 | 0.299 |
|                      |          | 3      | 0.039 | 0.136 | 0.511 | 0.068        | 0.033 | 0.400 | 0.071 | 0.029        | 0.491 | 0.059 | 0.017 | 0.390 |
|                      |          |        |       |       |       | 0.034        | 0.026 | 0.363 | 0.035 | 0.023        | 0.382 | 0.030 | 0.014 | 0.329 |
|                      | (100,50) | 1      | 0.046 | 0.090 | 0.444 | 0.071        | 0.024 | 0.431 | 0.075 | 0.016        | 0.345 | 0.063 | 0.017 | 0.104 |
|                      |          |        |       |       |       | 0.048        | 0.019 | 0.240 | 0.049 | 0.015        | 0.242 | 0.047 | 0.016 | 0.099 |
|                      |          | 2      | 0.047 | 0.091 | 0.479 | 0.065        | 0.031 | 0.295 | 0.069 | 0.026        | 0.415 | 0.051 | 0.025 | 0.315 |
|                      |          |        |       |       |       | 0.039        | 0.017 | 0.123 | 0.040 | 0.013        | 0.081 | 0.038 | 0.012 | 0.207 |
|                      |          | 3      | 0.053 | 0.125 | 0.445 | 0.074        | 0.023 | 0.333 | 0.076 | 0.018        | 0.399 | 0.068 | 0.016 | 0.362 |
|                      |          |        |       |       |       | 0.070        | 0.018 | 0.235 | 0.072 | 0.017        | 0.188 | 0.066 | 0.012 | 0.289 |
|                      | (100,80) | 1      | 0.045 | 0.076 | 0.350 | 0.050        | 0.018 | 0.320 | 0.052 | 0.013        | 0.223 | 0.040 | 0.014 | 0.072 |
|                      |          |        |       |       |       | 0.082        | 0.017 | 0.173 | 0.084 | 0.010        | 0.175 | 0.077 | 0.010 | 0.053 |
|                      |          | 2      | 0.046 | 0.080 | 0.392 | 0.022        | 0.022 | 0.185 | 0.023 | 0.019        | 0.250 | 0.018 | 0.015 | 0.201 |
|                      |          |        |       |       |       | 0.038        | 0.011 | 0.111 | 0.039 | 0.012        | 0.066 | 0.034 | 0.010 | 0.132 |
|                      |          | 3      | 0.040 | 0.116 | 0.227 | 0.057        | 0.016 | 0.207 | 0.060 | 0.015        | 0.095 | 0.048 | 0.015 | 0.148 |
|                      |          |        |       |       |       | 0.041        | 0.012 | 0.164 | 0.042 | 0.014        | 0.010 | 0.038 | 0.011 | 0.107 |

Table S5: The APE (1st column), RMSEs (2nd column) and MRABs (3rd column) of  $h(t)$ .

| $T$                  | $(n, m)$ | Scheme  | MLE   |       |       | SE           |       |              |       | GE           |       |       |       |       |       |
|----------------------|----------|---------|-------|-------|-------|--------------|-------|--------------|-------|--------------|-------|-------|-------|-------|-------|
|                      |          |         |       |       |       | Pr.1<br>Pr.2 |       | Pr.1<br>Pr.2 |       | Pr.1<br>Pr.2 |       |       |       |       |       |
|                      |          |         |       |       |       |              |       |              |       |              |       |       |       |       |       |
| $\kappa \rightarrow$ |          |         |       |       |       |              |       |              |       | -2           |       | +2    |       |       |       |
| 0.1                  | (50,25)  | 1       | 0.681 | 0.926 | 0.916 | 0.330        | 0.155 | 0.335        | 0.346 | 0.109        | 0.287 | 0.306 | 0.129 | 0.347 |       |
|                      |          |         |       |       |       | 0.333        | 0.141 | 0.341        | 0.343 | 0.104        | 0.260 | 0.319 | 0.123 | 0.330 |       |
|                      |          | 2       | 0.852 | 0.956 | 0.962 | 0.257        | 0.155 | 0.356        | 0.274 | 0.105        | 0.262 | 0.229 | 0.142 | 0.382 |       |
|                      |          |         |       |       |       | 0.354        | 0.096 | 0.226        | 0.361 | 0.070        | 0.176 | 0.340 | 0.080 | 0.214 |       |
|                      |          | 3       | 0.824 | 0.954 | 1.097 | 0.491        | 0.184 | 0.406        | 0.499 | 0.158        | 0.425 | 0.472 | 0.120 | 0.322 |       |
|                      |          |         |       |       |       | 0.331        | 0.142 | 0.352        | 0.338 | 0.134        | 0.359 | 0.318 | 0.109 | 0.293 |       |
|                      | (50,40)  | 1       | 0.451 | 0.591 | 0.440 | 0.279        | 0.132 | 0.322        | 0.299 | 0.094        | 0.234 | 0.252 | 0.120 | 0.321 |       |
|                      |          |         |       |       |       | 0.329        | 0.094 | 0.157        | 0.335 | 0.044        | 0.106 | 0.316 | 0.057 | 0.148 |       |
|                      |          | 2       | 0.486 | 0.731 | 0.548 | 0.279        | 0.144 | 0.321        | 0.300 | 0.093        | 0.232 | 0.251 | 0.120 | 0.322 |       |
|                      |          |         |       |       |       | 0.330        | 0.079 | 0.154        | 0.336 | 0.043        | 0.104 | 0.318 | 0.055 | 0.142 |       |
|                      |          | 3       | 0.793 | 0.746 | 0.938 | 0.291        | 0.153 | 0.325        | 0.303 | 0.131        | 0.345 | 0.271 | 0.102 | 0.273 |       |
|                      |          |         |       |       |       | 0.501        | 0.094 | 0.162        | 0.504 | 0.053        | 0.116 | 0.490 | 0.054 | 0.143 |       |
|                      | (100,50) | 1       | 0.398 | 0.237 | 0.276 | 0.257        | 0.123 | 0.199        | 0.264 | 0.055        | 0.138 | 0.242 | 0.066 | 0.175 |       |
|                      |          |         |       |       |       | 0.262        | 0.079 | 0.128        | 0.275 | 0.040        | 0.102 | 0.248 | 0.052 | 0.139 |       |
|                      |          | 2       | 0.475 | 0.696 | 0.529 | 0.422        | 0.077 | 0.155        | 0.425 | 0.055        | 0.146 | 0.412 | 0.045 | 0.121 |       |
|                      |          |         |       |       |       | 0.300        | 0.075 | 0.140        | 0.306 | 0.030        | 0.073 | 0.292 | 0.034 | 0.084 |       |
|                      |          | 3       | 0.742 | 0.645 | 0.833 | 0.448        | 0.121 | 0.267        | 0.452 | 0.082        | 0.219 | 0.436 | 0.100 | 0.268 |       |
|                      |          |         |       |       |       | 0.405        | 0.083 | 0.152        | 0.414 | 0.041        | 0.103 | 0.390 | 0.023 | 0.052 |       |
|                      | (100,80) | 1       | 0.378 | 0.093 | 0.174 | 0.364        | 0.061 | 0.115        | 0.368 | 0.027        | 0.115 | 0.353 | 0.018 | 0.048 |       |
|                      |          |         |       |       |       | 0.384        | 0.054 | 0.076        | 0.388 | 0.016        | 0.048 | 0.377 | 0.010 | 0.020 |       |
|                      |          | 2       | 0.387 | 0.154 | 0.209 | 0.336        | 0.071 | 0.140        | 0.341 | 0.033        | 0.083 | 0.326 | 0.042 | 0.112 |       |
|                      |          |         |       |       |       | 0.374        | 0.042 | 0.080        | 0.376 | 0.012        | 0.019 | 0.369 | 0.016 | 0.016 |       |
|                      |          | 3       | 0.579 | 0.605 | 0.748 | 0.516        | 0.100 | 0.212        | 0.528 | 0.077        | 0.191 | 0.479 | 0.065 | 0.175 |       |
|                      |          |         |       |       |       | 0.366        | 0.075 | 0.110        | 0.373 | 0.027        | 0.058 | 0.354 | 0.020 | 0.049 |       |
|                      | 0.5      | (50,25) | 1     | 0.768 | 0.905 | 0.843        | 0.336 | 0.275        | 0.683 | 0.351        | 0.263 | 0.608 | 0.312 | 0.223 | 0.601 |
|                      |          |         |       |       |       |              | 0.334 | 0.099        | 0.203 | 0.344        | 0.078 | 0.208 | 0.320 | 0.065 | 0.174 |
|                      |          |         | 2     | 0.961 | 0.917 | 0.907        | 0.225 | 0.264        | 0.651 | 0.248        | 0.251 | 0.675 | 0.196 | 0.213 | 0.572 |
|                      |          |         |       |       |       |              | 0.381 | 0.091        | 0.194 | 0.384        | 0.074 | 0.199 | 0.375 | 0.061 | 0.164 |
|                      |          |         | 3     | 0.821 | 1.004 | 0.961        | 0.400 | 0.167        | 0.327 | 0.404        | 0.095 | 0.241 | 0.388 | 0.117 | 0.315 |
|                      |          |         |       |       |       |              | 0.315 | 0.089        | 0.182 | 0.320        | 0.054 | 0.138 | 0.307 | 0.064 | 0.173 |
| (50,40)              |          | 1       | 0.502 | 0.771 | 0.573 | 0.624        | 0.121 | 0.214        | 0.633 | 0.062        | 0.159 | 0.594 | 0.075 | 0.198 |       |
|                      |          |         |       |       |       | 0.445        | 0.094 | 0.156        | 0.448 | 0.041        | 0.101 | 0.435 | 0.051 | 0.137 |       |
|                      |          | 2       | 0.538 | 0.834 | 0.689 | 0.612        | 0.189 | 0.455        | 0.621 | 0.147        | 0.397 | 0.583 | 0.176 | 0.473 |       |
|                      |          |         |       |       |       | 0.441        | 0.074 | 0.160        | 0.445 | 0.063        | 0.159 | 0.432 | 0.054 | 0.144 |       |
|                      |          | 3       | 0.827 | 0.758 | 0.847 | 0.280        | 0.127 | 0.210        | 0.306 | 0.061        | 0.153 | 0.254 | 0.074 | 0.200 |       |
|                      |          |         |       |       |       | 0.354        | 0.080 | 0.157        | 0.357 | 0.044        | 0.110 | 0.348 | 0.051 | 0.136 |       |
| (100,50)             |          | 1       | 0.422 | 0.460 | 0.334 | 0.316        | 0.118 | 0.189        | 0.331 | 0.050        | 0.125 | 0.297 | 0.060 | 0.158 |       |
|                      |          |         |       |       |       | 0.400        | 0.093 | 0.135        | 0.403 | 0.039        | 0.099 | 0.393 | 0.037 | 0.094 |       |
|                      |          | 2       | 0.511 | 0.735 | 0.617 | 0.383        | 0.155 | 0.389        | 0.387 | 0.138        | 0.339 | 0.372 | 0.135 | 0.362 |       |
|                      |          |         |       |       |       | 0.427        | 0.055 | 0.156        | 0.430 | 0.060        | 0.043 | 0.420 | 0.049 | 0.132 |       |
|                      |          | 3       | 0.713 | 0.631 | 0.658 | 0.309        | 0.100 | 0.202        | 0.318 | 0.060        | 0.132 | 0.297 | 0.062 | 0.165 |       |
|                      |          |         |       |       |       | 0.333        | 0.067 | 0.082        | 0.341 | 0.021        | 0.052 | 0.321 | 0.023 | 0.060 |       |
| (100,80)             |          | 1       | 0.386 | 0.184 | 0.195 | 0.389        | 0.062 | 0.114        | 0.393 | 0.034        | 0.086 | 0.378 | 0.023 | 0.060 |       |
|                      |          |         |       |       |       | 0.351        | 0.058 | 0.104        | 0.362 | 0.024        | 0.061 | 0.336 | 0.018 | 0.019 |       |
|                      |          | 2       | 0.388 | 0.146 | 0.224 | 0.515        | 0.077 | 0.122        | 0.518 | 0.017        | 0.167 | 0.505 | 0.016 | 0.112 |       |
|                      |          |         |       |       |       | 0.430        | 0.044 | 0.096        | 0.433 | 0.014        | 0.034 | 0.424 | 0.013 | 0.082 |       |
|                      |          | 3       | 0.547 | 0.533 | 0.284 | 0.330        | 0.065 | 0.135        | 0.347 | 0.034        | 0.089 | 0.310 | 0.017 | 0.046 |       |
|                      |          |         |       |       |       | 0.369        | 0.052 | 0.076        | 0.375 | 0.020        | 0.042 | 0.362 | 0.010 | 0.025 |       |

Table S6: The ACLs (1st column) and CPs (2nd column) of 95% ACI/HPD intervals of  $\alpha$ .

| $T$<br>Prior $\rightarrow$ | $(n, m)$ | Scheme | ACI   |       | HPD   |       |       |       |
|----------------------------|----------|--------|-------|-------|-------|-------|-------|-------|
|                            |          |        | ACL   | CP    | 1     |       | 2     |       |
|                            |          |        |       |       | ACL   | CP    | ACL   | CP    |
| 0.1                        | (50,25)  | 1      | 1.016 | 0.904 | 0.378 | 0.934 | 0.200 | 0.954 |
|                            |          | 2      | 1.066 | 0.894 | 0.319 | 0.925 | 0.155 | 0.944 |
|                            |          | 3      | 1.139 | 0.881 | 0.329 | 0.921 | 0.168 | 0.935 |
|                            | (50,40)  | 1      | 0.961 | 0.938 | 0.296 | 0.944 | 0.132 | 0.977 |
|                            |          | 2      | 0.983 | 0.926 | 0.294 | 0.942 | 0.106 | 0.969 |
|                            |          | 3      | 0.991 | 0.919 | 0.229 | 0.960 | 0.165 | 0.975 |
|                            | (100,50) | 1      | 0.760 | 0.950 | 0.289 | 0.954 | 0.123 | 0.980 |
|                            |          | 2      | 0.827 | 0.936 | 0.181 | 0.968 | 0.103 | 0.976 |
|                            |          | 3      | 0.961 | 0.927 | 0.226 | 0.961 | 0.120 | 0.980 |
|                            | (100,80) | 1      | 0.599 | 0.973 | 0.186 | 0.969 | 0.085 | 0.983 |
|                            |          | 2      | 0.592 | 0.957 | 0.119 | 0.980 | 0.081 | 0.980 |
|                            |          | 3      | 0.874 | 0.944 | 0.224 | 0.961 | 0.116 | 0.982 |
| 0.5                        | (50,25)  | 1      | 0.993 | 0.914 | 0.396 | 0.931 | 0.224 | 0.947 |
|                            |          | 2      | 1.017 | 0.906 | 0.340 | 0.920 | 0.169 | 0.941 |
|                            |          | 3      | 1.057 | 0.902 | 0.371 | 0.915 | 0.160 | 0.933 |
|                            | (50,40)  | 1      | 0.898 | 0.923 | 0.291 | 0.945 | 0.201 | 0.965 |
|                            |          | 2      | 0.946 | 0.918 | 0.237 | 0.950 | 0.167 | 0.959 |
|                            |          | 3      | 0.984 | 0.910 | 0.357 | 0.955 | 0.152 | 0.976 |
|                            | (100,50) | 1      | 0.745 | 0.938 | 0.241 | 0.959 | 0.166 | 0.975 |
|                            |          | 2      | 0.798 | 0.923 | 0.214 | 0.966 | 0.136 | 0.970 |
|                            |          | 3      | 0.857 | 0.920 | 0.233 | 0.960 | 0.139 | 0.978 |
|                            | (100,80) | 1      | 0.594 | 0.957 | 0.182 | 0.970 | 0.119 | 0.977 |
|                            |          | 2      | 0.600 | 0.952 | 0.149 | 0.978 | 0.121 | 0.975 |
|                            |          | 3      | 0.841 | 0.940 | 0.216 | 0.963 | 0.111 | 0.979 |

Table S7: The ACLs (1st column) and CPs (2nd column) of 95% ACI/HPD intervals of  $\beta$ .

| $T$<br>Prior $\rightarrow$ | $(n, m)$ | Scheme | ACI   |       | HPD   |       |       |       |
|----------------------------|----------|--------|-------|-------|-------|-------|-------|-------|
|                            |          |        | ACL   | CP    | 1     |       | 2     |       |
|                            |          |        |       |       | ACL   | CP    | ACL   | CP    |
| 0.1                        | (50,25)  | 1      | 0.595 | 0.919 | 0.166 | 0.947 | 0.135 | 0.951 |
|                            |          | 2      | 0.837 | 0.907 | 0.161 | 0.950 | 0.118 | 0.955 |
|                            |          | 3      | 0.871 | 0.902 | 0.181 | 0.938 | 0.128 | 0.953 |
|                            | (50,40)  | 1      | 0.329 | 0.940 | 0.160 | 0.955 | 0.112 | 0.963 |
|                            |          | 2      | 0.377 | 0.934 | 0.154 | 0.962 | 0.109 | 0.974 |
|                            |          | 3      | 0.759 | 0.922 | 0.157 | 0.958 | 0.114 | 0.961 |
|                            | (100,50) | 1      | 0.256 | 0.959 | 0.105 | 0.972 | 0.103 | 0.975 |
|                            |          | 2      | 0.344 | 0.948 | 0.094 | 0.976 | 0.084 | 0.979 |
|                            |          | 3      | 0.590 | 0.935 | 0.143 | 0.964 | 0.109 | 0.969 |
|                            | (100,80) | 1      | 0.174 | 0.963 | 0.102 | 0.978 | 0.087 | 0.988 |
|                            |          | 2      | 0.194 | 0.958 | 0.086 | 0.979 | 0.075 | 0.986 |
|                            |          | 3      | 0.492 | 0.944 | 0.115 | 0.973 | 0.105 | 0.978 |
| 0.5                        | (50,25)  | 1      | 0.634 | 0.916 | 0.183 | 0.935 | 0.135 | 0.950 |
|                            |          | 2      | 0.956 | 0.903 | 0.180 | 0.937 | 0.105 | 0.958 |
|                            |          | 3      | 0.984 | 0.895 | 0.175 | 0.939 | 0.116 | 0.956 |
|                            | (50,40)  | 1      | 0.373 | 0.931 | 0.165 | 0.947 | 0.125 | 0.959 |
|                            |          | 2      | 0.441 | 0.927 | 0.172 | 0.942 | 0.087 | 0.981 |
|                            |          | 3      | 0.905 | 0.914 | 0.153 | 0.951 | 0.088 | 0.966 |
|                            | (100,50) | 1      | 0.286 | 0.952 | 0.141 | 0.965 | 0.104 | 0.978 |
|                            |          | 2      | 0.417 | 0.943 | 0.109 | 0.969 | 0.079 | 0.983 |
|                            |          | 3      | 0.830 | 0.923 | 0.112 | 0.968 | 0.082 | 0.980 |
|                            | (100,80) | 1      | 0.178 | 0.960 | 0.112 | 0.971 | 0.086 | 0.987 |
|                            |          | 2      | 0.197 | 0.957 | 0.099 | 0.975 | 0.073 | 0.988 |
|                            |          | 3      | 0.636 | 0.936 | 0.102 | 0.974 | 0.069 | 0.988 |



Table S8: The ACLs (1st column) and CPs (2nd column) of 95% ACI/HPD intervals of  $\theta$ .

| $T$<br>Prior $\rightarrow$ | $(n, m)$ | Scheme | ACI   |       | HPD   |       |       |       |
|----------------------------|----------|--------|-------|-------|-------|-------|-------|-------|
|                            |          |        | ACL   | CP    | 1     |       | 2     |       |
|                            |          |        |       |       | ACL   | CP    | ACL   | CP    |
| 0.1                        | (50,25)  | 1      | 0.296 | 0.936 | 0.267 | 0.947 | 0.118 | 0.956 |
|                            |          | 2      | 0.360 | 0.930 | 0.281 | 0.943 | 0.099 | 0.959 |
|                            |          | 3      | 0.369 | 0.925 | 0.200 | 0.955 | 0.097 | 0.960 |
|                            | (50,40)  | 1      | 0.238 | 0.956 | 0.191 | 0.965 | 0.095 | 0.977 |
|                            |          | 2      | 0.239 | 0.955 | 0.220 | 0.962 | 0.097 | 0.974 |
|                            |          | 3      | 0.298 | 0.938 | 0.164 | 0.974 | 0.093 | 0.978 |
|                            | (100,50) | 1      | 0.205 | 0.968 | 0.137 | 0.977 | 0.092 | 0.982 |
|                            |          | 2      | 0.221 | 0.959 | 0.204 | 0.969 | 0.084 | 0.985 |
|                            |          | 3      | 0.207 | 0.966 | 0.106 | 0.980 | 0.089 | 0.983 |
|                            | (100,80) | 1      | 0.158 | 0.976 | 0.122 | 0.981 | 0.079 | 0.993 |
|                            |          | 2      | 0.164 | 0.973 | 0.070 | 0.985 | 0.062 | 0.992 |
|                            |          | 3      | 0.163 | 0.973 | 0.094 | 0.983 | 0.078 | 0.995 |
| 0.5                        | (50,25)  | 1      | 0.281 | 0.950 | 0.155 | 0.962 | 0.103 | 0.973 |
|                            |          | 2      | 0.322 | 0.943 | 0.258 | 0.948 | 0.111 | 0.960 |
|                            |          | 3      | 0.343 | 0.932 | 0.186 | 0.955 | 0.129 | 0.958 |
|                            | (50,40)  | 1      | 0.221 | 0.962 | 0.138 | 0.973 | 0.094 | 0.978 |
|                            |          | 2      | 0.272 | 0.960 | 0.224 | 0.965 | 0.105 | 0.979 |
|                            |          | 3      | 0.281 | 0.945 | 0.160 | 0.971 | 0.084 | 0.982 |
|                            | (100,50) | 1      | 0.200 | 0.973 | 0.137 | 0.984 | 0.079 | 0.990 |
|                            |          | 2      | 0.221 | 0.963 | 0.137 | 0.984 | 0.097 | 0.988 |
|                            |          | 3      | 0.208 | 0.968 | 0.135 | 0.982 | 0.076 | 0.989 |
|                            | (100,80) | 1      | 0.153 | 0.979 | 0.123 | 0.986 | 0.062 | 0.993 |
|                            |          | 2      | 0.163 | 0.974 | 0.101 | 0.982 | 0.091 | 0.990 |
|                            |          | 3      | 0.170 | 0.971 | 0.117 | 0.985 | 0.072 | 0.991 |

Table S9: The ACLs (1st column) and CPs (2nd column) of 95% ACI/HPD intervals of  $R(t)$ .

| $T$<br>Prior $\rightarrow$ | $(n, m)$ | Scheme | ACI   |       | HPD   |       |       |       |
|----------------------------|----------|--------|-------|-------|-------|-------|-------|-------|
|                            |          |        |       |       | 1     |       | 2     |       |
|                            |          |        | ACL   | CP    | ACL   | CP    | ACL   | CP    |
| 0.1                        | (50,25)  | 1      | 0.128 | 0.920 | 0.107 | 0.931 | 0.056 | 0.957 |
|                            |          | 2      | 0.151 | 0.912 | 0.130 | 0.927 | 0.040 | 0.960 |
|                            |          | 3      | 0.241 | 0.894 | 0.083 | 0.936 | 0.053 | 0.959 |
|                            | (50,40)  | 1      | 0.105 | 0.935 | 0.100 | 0.942 | 0.049 | 0.968 |
|                            |          | 2      | 0.132 | 0.924 | 0.105 | 0.936 | 0.037 | 0.972 |
|                            |          | 3      | 0.203 | 0.913 | 0.055 | 0.958 | 0.045 | 0.970 |
|                            | (100,50) | 1      | 0.093 | 0.941 | 0.083 | 0.948 | 0.039 | 0.976 |
|                            |          | 2      | 0.112 | 0.934 | 0.063 | 0.952 | 0.031 | 0.980 |
|                            |          | 3      | 0.122 | 0.930 | 0.046 | 0.964 | 0.039 | 0.975 |
|                            | (100,80) | 1      | 0.073 | 0.953 | 0.053 | 0.965 | 0.030 | 0.984 |
|                            |          | 2      | 0.079 | 0.950 | 0.025 | 0.973 | 0.020 | 0.988 |
|                            |          | 3      | 0.096 | 0.937 | 0.036 | 0.969 | 0.018 | 0.990 |
| 0.5                        | (50,25)  | 1      | 0.125 | 0.926 | 0.081 | 0.943 | 0.057 | 0.955 |
|                            |          | 2      | 0.153 | 0.911 | 0.147 | 0.925 | 0.037 | 0.963 |
|                            |          | 3      | 0.235 | 0.900 | 0.078 | 0.952 | 0.056 | 0.958 |
|                            | (50,40)  | 1      | 0.100 | 0.941 | 0.079 | 0.952 | 0.049 | 0.968 |
|                            |          | 2      | 0.117 | 0.939 | 0.083 | 0.945 | 0.035 | 0.975 |
|                            |          | 3      | 0.207 | 0.912 | 0.071 | 0.955 | 0.043 | 0.972 |
|                            | (100,50) | 1      | 0.091 | 0.947 | 0.061 | 0.961 | 0.030 | 0.980 |
|                            |          | 2      | 0.109 | 0.945 | 0.032 | 0.965 | 0.031 | 0.979 |
|                            |          | 3      | 0.121 | 0.931 | 0.061 | 0.960 | 0.039 | 0.976 |
|                            | (100,80) | 1      | 0.073 | 0.954 | 0.032 | 0.976 | 0.025 | 0.987 |
|                            |          | 2      | 0.079 | 0.952 | 0.029 | 0.977 | 0.021 | 0.989 |
|                            |          | 3      | 0.098 | 0.936 | 0.053 | 0.964 | 0.029 | 0.986 |

Table S10: The ACLs (1st column) and CPs (2nd column) of 95% ACI/HPD intervals of  $h(t)$ .

| $T$<br>Prior $\rightarrow$ | $(n, m)$ | Scheme | ACI   |       | HPD   |       |       |       |
|----------------------------|----------|--------|-------|-------|-------|-------|-------|-------|
|                            |          |        |       |       | 1     |       | 2     |       |
|                            |          |        | ACL   | CP    | ACL   | CP    | ACL   | CP    |
| 0.1                        | (50,25)  | 1      | 1.173 | 0.892 | 0.315 | 0.918 | 0.239 | 0.930 |
|                            |          | 2      | 1.663 | 0.885 | 0.316 | 0.917 | 0.220 | 0.926 |
|                            |          | 3      | 1.800 | 0.879 | 0.376 | 0.910 | 0.243 | 0.919 |
|                            | (50,40)  | 1      | 0.644 | 0.903 | 0.312 | 0.925 | 0.214 | 0.939 |
|                            |          | 2      | 0.744 | 0.894 | 0.298 | 0.931 | 0.205 | 0.938 |
|                            |          | 3      | 1.488 | 0.885 | 0.296 | 0.932 | 0.212 | 0.936 |
|                            | (100,50) | 1      | 0.502 | 0.933 | 0.211 | 0.942 | 0.204 | 0.963 |
|                            |          | 2      | 0.687 | 0.924 | 0.186 | 0.953 | 0.160 | 0.964 |
|                            |          | 3      | 1.232 | 0.906 | 0.262 | 0.938 | 0.207 | 0.947 |
|                            | (100,80) | 1      | 0.341 | 0.946 | 0.194 | 0.954 | 0.168 | 0.976 |
|                            |          | 2      | 0.384 | 0.941 | 0.156 | 0.962 | 0.130 | 0.978 |
|                            |          | 3      | 0.990 | 0.918 | 0.228 | 0.945 | 0.204 | 0.957 |
| 0.5                        | (50,25)  | 1      | 1.254 | 0.888 | 0.377 | 0.912 | 0.240 | 0.925 |
|                            |          | 2      | 1.903 | 0.874 | 0.374 | 0.913 | 0.205 | 0.932 |
|                            |          | 3      | 1.718 | 0.881 | 0.322 | 0.924 | 0.215 | 0.930 |
|                            | (50,40)  | 1      | 0.737 | 0.896 | 0.314 | 0.927 | 0.229 | 0.937 |
|                            |          | 2      | 0.875 | 0.898 | 0.318 | 0.924 | 0.163 | 0.941 |
|                            |          | 3      | 1.424 | 0.890 | 0.288 | 0.935 | 0.166 | 0.940 |
|                            | (100,50) | 1      | 0.564 | 0.927 | 0.268 | 0.937 | 0.203 | 0.961 |
|                            |          | 2      | 0.832 | 0.912 | 0.194 | 0.952 | 0.153 | 0.963 |
|                            |          | 3      | 1.304 | 0.902 | 0.221 | 0.947 | 0.153 | 0.963 |
|                            | (100,80) | 1      | 0.348 | 0.943 | 0.215 | 0.951 | 0.156 | 0.979 |
|                            |          | 2      | 0.389 | 0.938 | 0.193 | 0.957 | 0.136 | 0.974 |
|                            |          | 3      | 1.280 | 0.908 | 0.201 | 0.953 | 0.135 | 0.975 |

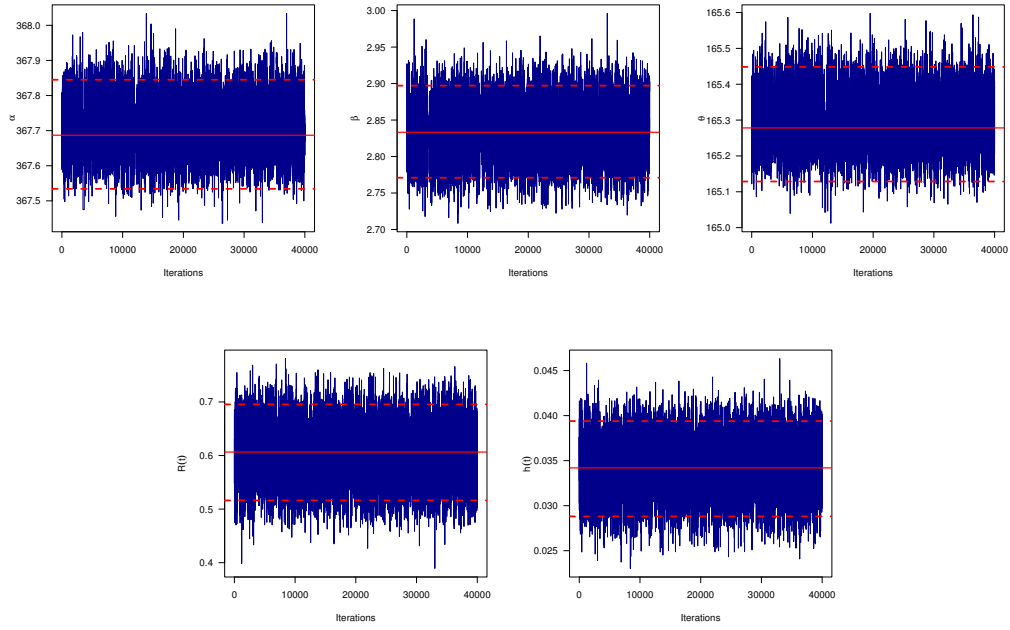

Figure S1: Trace plots of  $\alpha$ ,  $\beta$ ,  $\theta$ ,  $R(t)$  and  $h(t)$  using  $\mathcal{S}_2$  from coating weight data.

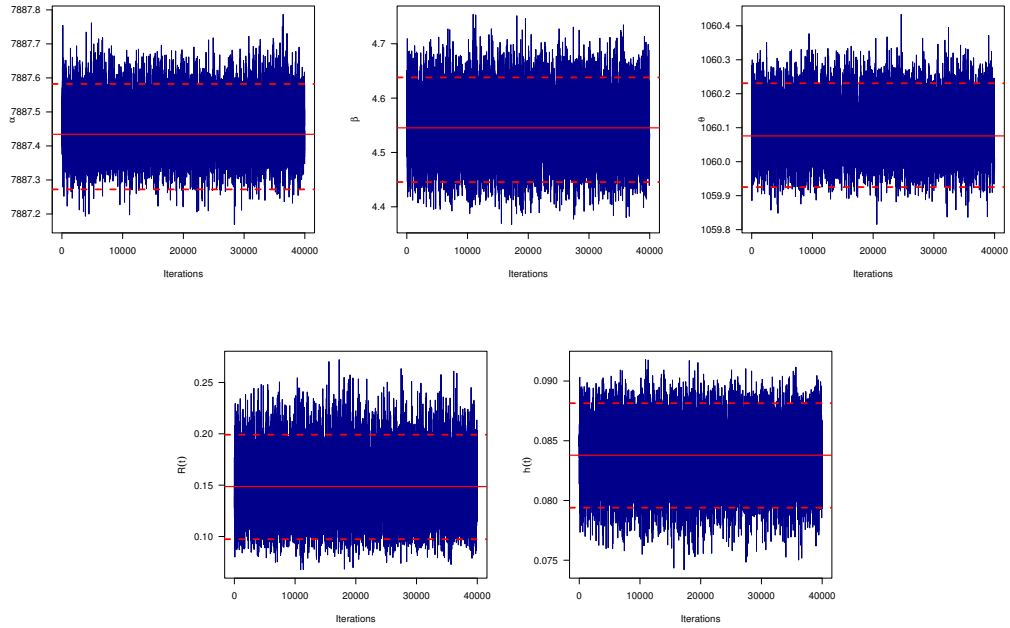

Figure S2: Trace plots of  $\alpha$ ,  $\beta$ ,  $\theta$ ,  $R(t)$  and  $h(t)$  using  $\mathcal{S}_3$  from coating weight data.

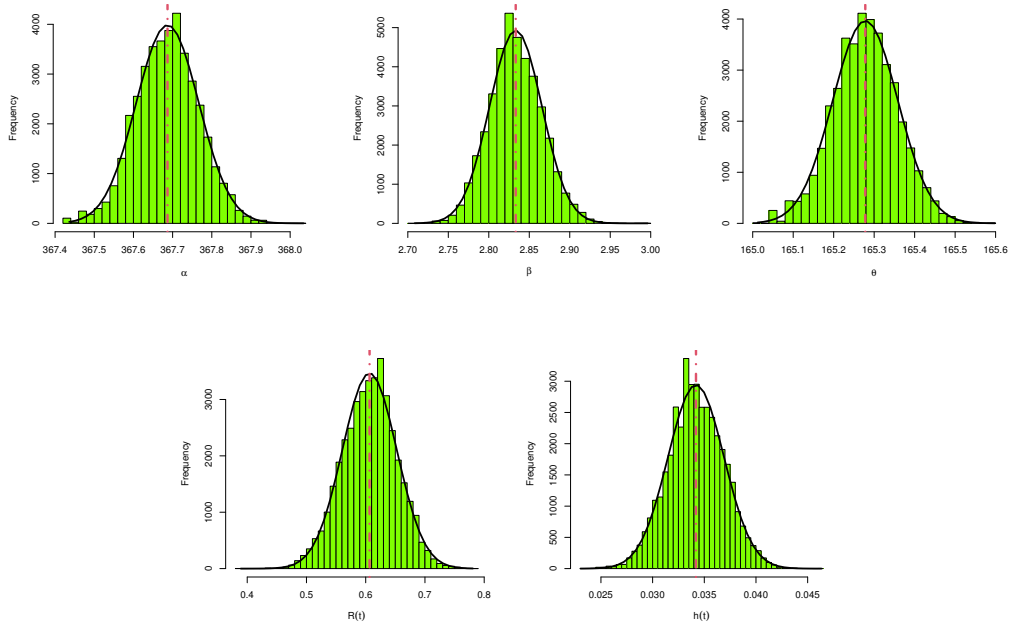

Figure S3: Histograms of  $\alpha$ ,  $\beta$ ,  $\theta$ ,  $R(t)$  and  $h(t)$  using  $\mathcal{S}_2$  from coating weight data.

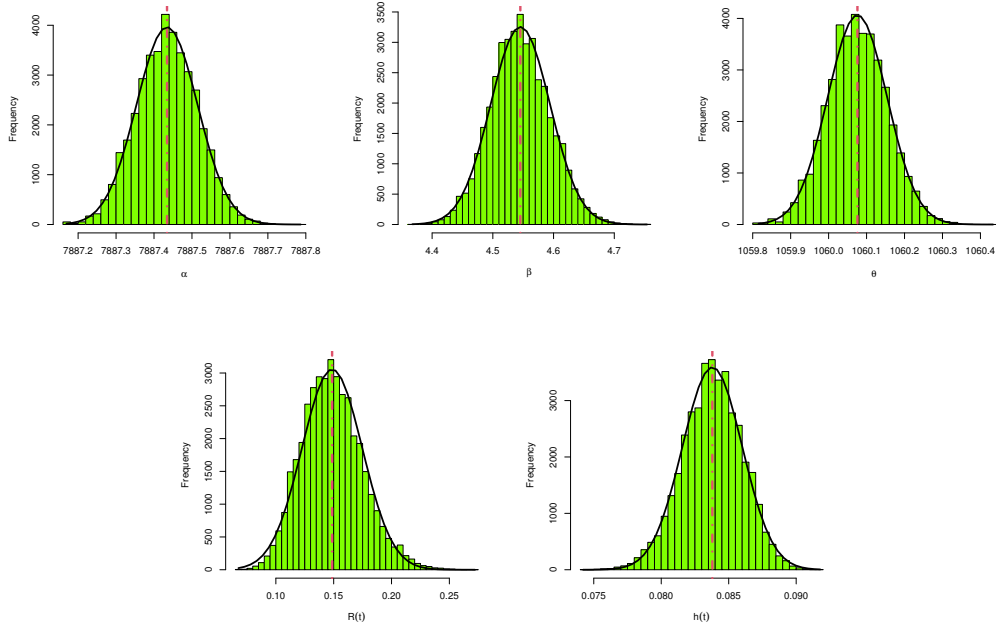

Figure S4: Histograms of  $\alpha$ ,  $\beta$ ,  $\theta$ ,  $R(t)$  and  $h(t)$  using  $\mathcal{S}_3$  from coating weight data.

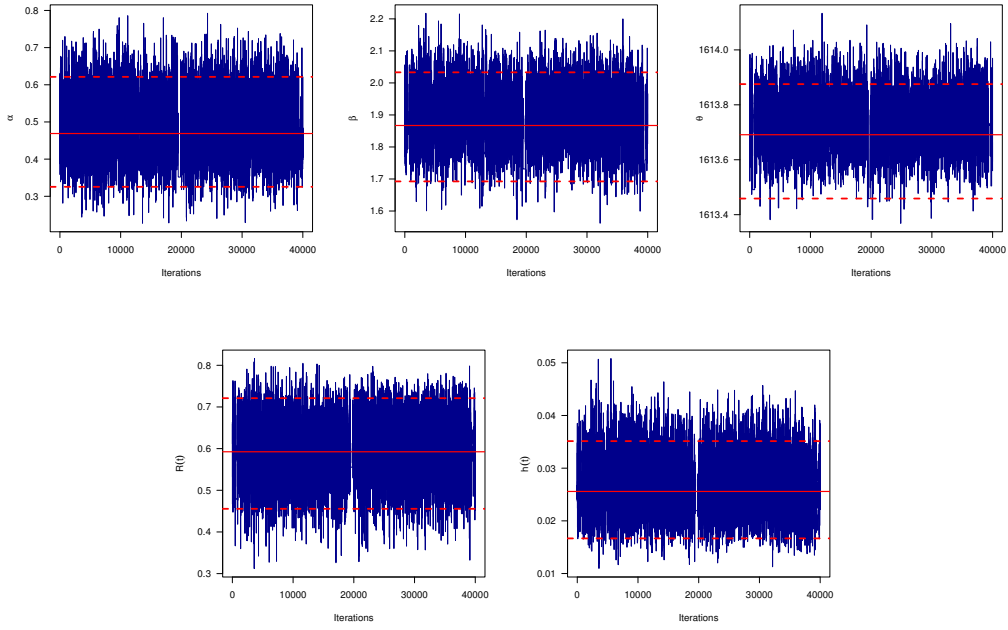

Figure S5: Trace plots of  $\alpha$ ,  $\beta$ ,  $\theta$ ,  $R(t)$  and  $h(t)$  using  $\mathcal{S}_2$  from electronic components data.

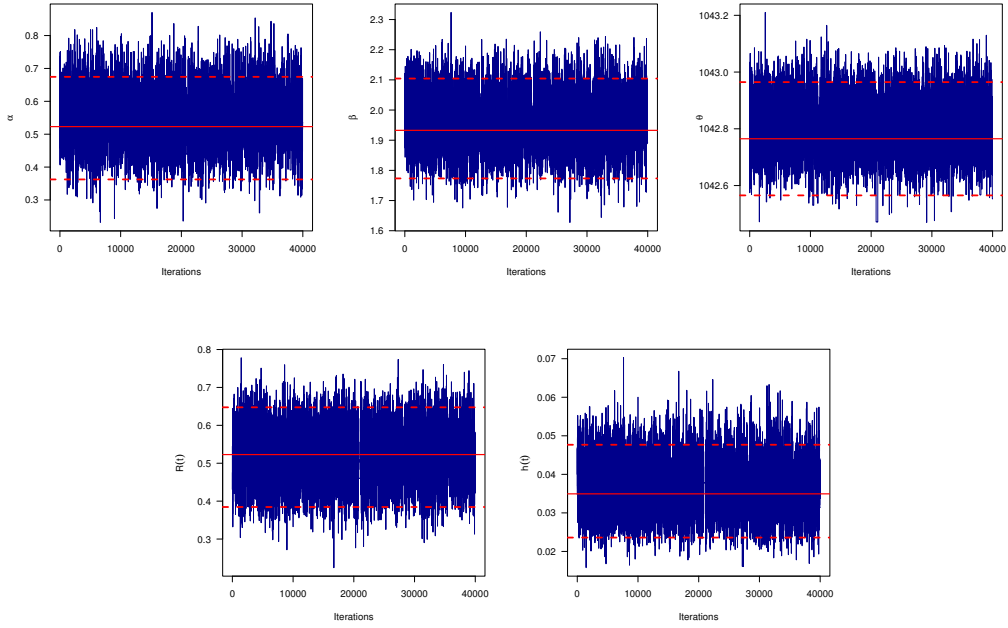

Figure S6: Trace plots of  $\alpha$ ,  $\beta$ ,  $\theta$ ,  $R(t)$  and  $h(t)$  using  $\mathcal{S}_3$  from electronic components data.

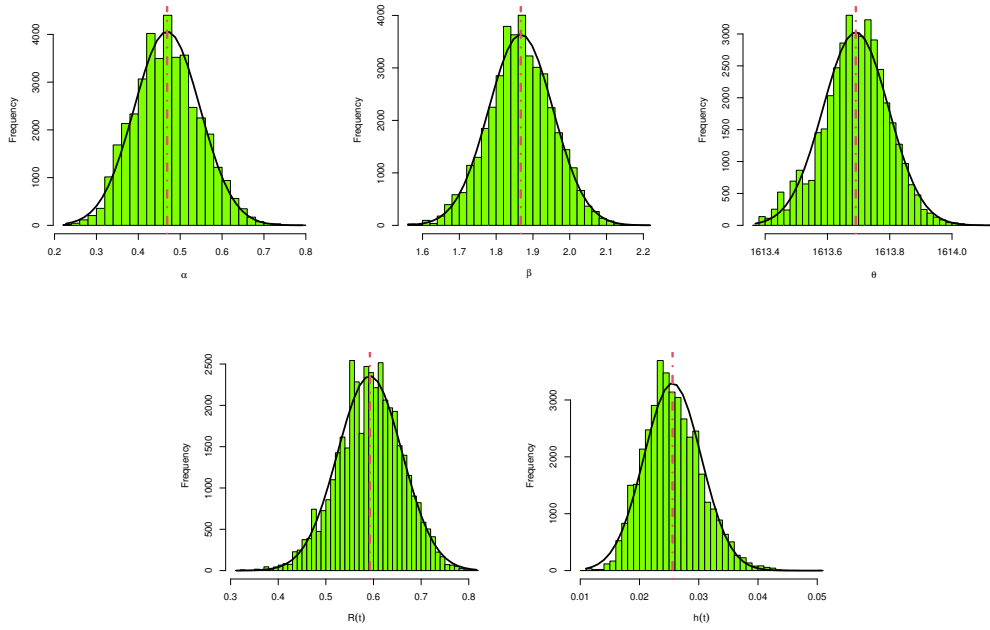

Figure S7: Histograms of  $\alpha$ ,  $\beta$ ,  $\theta$ ,  $R(t)$  and  $h(t)$  using  $\mathcal{S}_2$  from electronic components data.

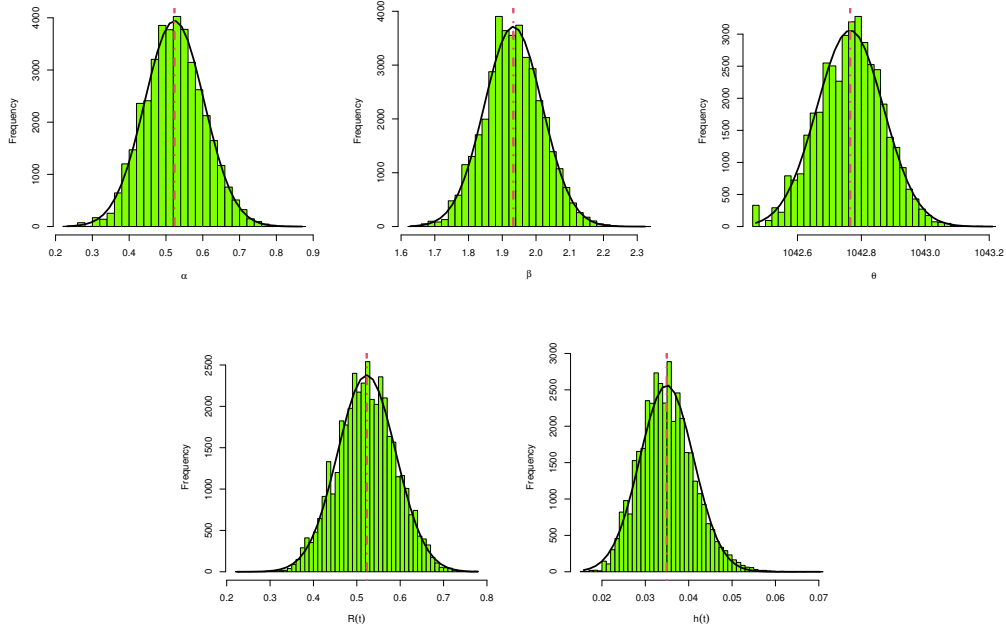

Figure S8: Histograms of  $\alpha$ ,  $\beta$ ,  $\theta$ ,  $R(t)$  and  $h(t)$  using  $\mathcal{S}_3$  from electronic components data.
